### Corrigendum

**Minetti, A. E.** (2004). Passive tools for enhancing muscle-driven motion and locomotion. *J. Exp. Biol.* **207**, 1265-1272.

Unfortunately equations Ai and Aii in the first part of the Appendix to this Commentary were published incorrectly.

The correct text should read:

The speed values in Fig. 2 were obtained by estimating, for each duration ( $t$ , in s), the maximum sustainable mechanical effort (Wilkie, 1980) as:

$$\dot{W}_{\text{MECH}} = A + \frac{B}{t} - \left( \frac{A \cdot \tau \left( 1 - e^{-\left(\frac{t}{\tau}\right)} \right)}{t} \right), \quad (\text{Ai})$$

where  $A$  is the maximum long-term mechanical work rate (W),  $B$  is the mechanical equivalent of the available energy from anaerobic sources (J) and  $\tau$  is the time constant (s) describing the inertia of the system. As developed by Wilkie, this equation is accurate for durations of 40 s to 10 min. To take into account the decay of the sustainable maximum oxygen consumption for longer exercise durations (Saltin, 1973), terms  $A$  have been multiplied by:

$$\frac{\dot{V}_{\text{O}_2}}{\dot{V}_{\text{O}_2\text{max}}} = \frac{940 - (t/60)}{1000}, \quad (\text{Aii})$$

where the first ratio represents the sustainable proportion of the total metabolic power.

The author apologises for any inconvenience this may have caused.
